# Supplementary material
Source: PubMed Central journal article supplement (PMC9251649)
Supplement: NIHMS1694177-supplement-1694177_Sup1.pdf [file NIHMS1694177-supplement-1694177_Sup1.pdf]

---

**Supplementary information**

---

**An amygdala circuit that suppresses social engagement**

---

In the format provided by the authors and unedited

**Figure 1b: Percent mice mounting to PBS or LPS-female: Chi-Squared Test of Independence (95% confidence interval)**

$X^2=5.238$ ,  $df=1$

$p=0.0221$

Descriptive Statistics:

|            | Percent | N  |
|------------|---------|----|
| PBS-female | 90.9    | 11 |
| LPS-female | 45.5    | 11 |

**Figure 1c: Mounting time to PBS- or LPS- female: Unpaired two-tailed t-test (95% confidence interval)**

$t=4.826$ ,  $df=20$

$p=0.0001$

Descriptive Statistics:

|            | Mean  | SEM   | N  |
|------------|-------|-------|----|
| PBS-female | 41.61 | 7.927 | 11 |
| LPS-female | 2.866 | 1.279 | 11 |

**Figure 1d: Number of mounts to PBS- or LPS-female: Unpaired two-tailed t-test (95% confidence interval)**

$t=5.745$ ,  $df=20$

$p<0.0001$

Descriptive Statistics:

|            | Mean | SEM    | N  |
|------------|------|--------|----|
| PBS-female | 10   | 1.495  | 11 |
| LPS-female | 1.0  | 0.4671 | 11 |

**Figure 1e: Latency to mount to PBS- or LPS-female: Unpaired two-tailed t-test (95% confidence interval)**

$t=3.535$ ,  $df=20$

$p=0.0021$

Descriptive Statistics:

|            | Mean  | SEM   | N  |
|------------|-------|-------|----|
| PBS-female | 254.0 | 39.31 | 11 |
| LPS-female | 475.4 | 48.76 | 11 |

**Figure 1g: FOS fold change in AOBmi, AOBgr, BST, MEApd, MEApv, and COApm after exposure to PBS or LPS-female: Two-way ANOVA (95% confidence interval)**

| Source of variation                                   | F (DFn, DFd)      | P value    |
|-------------------------------------------------------|-------------------|------------|
| Treatment (PBS or LPS)                                | F (1, 84) = 73.15 | P < 0.0001 |
| Brain Region (AOBmi, AOBgr, BST, MEApd, MEApv, COApm) | F (5, 84) = 20.69 | P < 0.0001 |
| Interaction                                           | F (5, 84) = 20.69 | P < 0.0001 |

Post-hoc (Sidak's):

| PBS vs. LPS | P Value |
|-------------|---------|
| AOBmi       | >0.9999 |
| AOBgr       | 0.0111  |
| BST         | 0.9580  |
| MEApd       | 0.9898  |
| MEApv       | 0.0019  |
| COApm       | <0.0001 |

Descriptive Statistics:

|     | AOBmi |       |   | AOBgr |       |   | BST   |       |   |
|-----|-------|-------|---|-------|-------|---|-------|-------|---|
|     | Mean  | SEM   | n | Mean  | SEM   | n | Mean  | SEM   | n |
| PBS | 1     | 0.170 | 8 | 1     | 0,162 | 8 | 1     | 0.107 | 8 |
| LPS | 1.089 | 0.159 | 8 | 2.231 | 0.373 | 8 | 1.317 | 0/119 | 8 |
|     | MEApd |       |   | MEApv |       |   | COApm |       |   |
|     | Mean  | SEM   | n | Mean  | SEM   | n | Mean  | SEM   | n |
| PBS | 1     | 0.193 | 8 | 1     | 0.165 | 8 | 1     | 0.193 | 8 |
| LPS | 1.239 | 0.206 | 8 | 2.439 | 0.369 | 8 | 5.706 | 0.596 | 8 |

**Figure 11: Mean z-score of COApm bulk fluorescence signal during investigation of PBS or LPS-female:**

Paired two-tailed t-test (95% confidence interval)

$t=3.736$ ,  $df=5$

$p=0.0135$

Descriptive Statistics:

|            | Mean  | SEM   | N |
|------------|-------|-------|---|
| PBS-female | 2.606 | 0.307 | 6 |
| LPS-female | 5.984 | 1.058 | 6 |

**Figure 2b: Percent male mounting during COApm photoactivation: Chi-Squared Test of Independence (95% confidence interval)**

$X^2=6.112$ ,  $df=1$

$p=0.0134$

Descriptive Statistics:

|      | Percent | N |
|------|---------|---|
| EYFP | 88.9    | 9 |

|      |      |   |
|------|------|---|
| ChR2 | 28.6 | 7 |
|------|------|---|

**Figure 2c: Mounting Time to healthy female during COApm photoactivation:** Two-way repeated measures ANOVA (95% confidence interval)

| Source of variation   | F (DFn, DFd)  | P value |
|-----------------------|---------------|---------|
| Group (EYFP vs. ChR2) | F(1,14)=4.976 | 0.0426  |
| Light (On vs. Off)    | F(1,14)=4.683 | 0.0482  |
| Interaction           | F(1,14)=9.578 | 0.0079  |

Post-hoc (Bonferroni's):

| EYFP vs. ChR2 | P Value |
|---------------|---------|
| Light On      | 0.0028  |
| Light Off     | >0.9999 |

Descriptive Statistics:

|      | Light On |        |   | Light Off |        |   |
|------|----------|--------|---|-----------|--------|---|
|      | Mean     | SEM    | n | Mean      | SEM    | n |
| EYFP | 52.862   | 11.764 | 9 | 45.498    | 9.516  | 9 |
| ChR2 | 0.834    | 0.647  | 7 | 42.446    | 13.097 | 7 |

**Figure 2d: Number of mounts to healthy female during COApm photoactivation:** Two-way repeated measures ANOVA (95% confidence interval)

| Source of variation   | F (DFn, DFd)    | P value |
|-----------------------|-----------------|---------|
| Group (EYFP vs. ChR2) | F(1,14) = 3.498 | 0.0825  |
| Light (On vs. Off)    | F(1,14) = 10.60 | 0.0057  |
| Interaction           | F(1,14) = 5.999 | 0.0281  |

Post-hoc (Bonferroni's):

| EYFP vs. ChR2 | P Value |
|---------------|---------|
| Light On      | 0.0113  |
| Light Off     | >0.9999 |

Descriptive Statistics:

|  | Light On |     |   | Light Off |     |   |
|--|----------|-----|---|-----------|-----|---|
|  | Mean     | SEM | n | Mean      | SEM | n |

|      |        |       |   |        |       |   |
|------|--------|-------|---|--------|-------|---|
| EYFP | 12.444 | 2.298 | 9 | 14.444 | 3.010 | 9 |
| ChR2 | 0.714  | 0.565 | 7 | 14.857 | 3.906 | 7 |

**Figure 2e: Latency to mount to healthy female during COApm photoactivation:** Two-way repeated measures ANOVA (95% confidence interval)

| Source of variation   | F (DFn, DFd)    | P value |
|-----------------------|-----------------|---------|
| Group (EYFP vs. ChR2) | F(1,14) = 6.636 | 0.0220  |
| Light (On vs. Off)    | F(1,14) = 17.32 | 0.0010  |
| Interaction           | F(1,14) = 12.40 | 0.0034  |

Post-hoc (Bonferroni's):

| EYFP vs. ChR2 | P Value |
|---------------|---------|
| Light On      | 0.0005  |
| Light Off     | >0.9999 |

Descriptive Statistics:

|      | Light On |        |   | Light Off |         |   |
|------|----------|--------|---|-----------|---------|---|
|      | Mean     | SEM    | n | Mean      | SEM     | n |
| EYFP | 293.396  | 52.964 | 9 | 265.178   | 64.458  | 9 |
| ChR2 | 596.026  | 2.738  | 7 | 257.600   | 42.0101 | 7 |

**Figure 2f. Feeding during COApm photoactivation-Amount:** Unpaired two-tailed t-test (95% confidence interval)

$t=0.05443$ ,  $df=14$

$p=0.9574$

Descriptive Statistics:

|      | Mean   | SEM     | N |
|------|--------|---------|---|
| EYFP | 0.3975 | 0.04003 | 8 |
| ChR2 | 0.3950 | 0.02252 | 8 |

**Figure 2f: Feeding during COApm photoactivation-Time spent:** Unpaired two-tailed t-test (95% confidence interval)

$t=0.9208$ ,  $df=14$

$p=0.3728$

Descriptive Statistics:

|      | Mean  | SEM    | N |
|------|-------|--------|---|
| EYFP | 6.188 | 0.3140 | 8 |

|      |       |        |   |
|------|-------|--------|---|
| ChR2 | 5.742 | 0.3688 | 8 |
|------|-------|--------|---|

**Figure 2g: Sociability during COApm photoactivation-Social preference (%):** Unpaired two-tailed t-test (95% confidence interval)

$t=0.2554$ ,  $df=13$

$p=0.8024$

Descriptive Statistics:

|      | Mean  | SEM   | N |
|------|-------|-------|---|
| EYFP | 72.95 | 3.891 | 9 |
| ChR2 | 71.46 | 4.113 | 6 |

**Figure 2g: Sociability during COApm photoactivation-Total investigation (min):** Unpaired two-tailed t-test (95% confidence interval)

$t=1.088$ ,  $df=13$

$p=0.2962$

Descriptive Statistics:

|      | Mean  | SEM    | N |
|------|-------|--------|---|
| EYFP | 7.028 | 0.1994 | 9 |
| ChR2 | 6.461 | 0.5735 | 6 |

**Figure 2h: RTPP during COApm photoactivation-Stim.preference (%):** Unpaired two-tailed t-test (95% confidence interval)

$t=1.749$ ,  $df=15$

$p=0.1007$

Descriptive Statistics:

|      | Mean  | SEM   | N |
|------|-------|-------|---|
| EYFP | 48.42 | 2.126 | 9 |
| ChR2 | 55.05 | 3.241 | 8 |

**Figure 2j: Percent male mounting to LPS-female during COApm hM4Di inhibition:** Chi-Squared Test of Independence (95% confidence interval)

$X^2=1.418$ ,  $df=1$

$p=0.2337$

Descriptive Statistics:

|         | Percent | N  |
|---------|---------|----|
| mCherry | 60      | 15 |
| hM4Di   | 81.8    | 11 |

**Figure 2k: Mounting time to LPS-female during COApm hM4Di Inhibition:** Unpaired two-tailed t-test (95% confidence interval)

$t=3.158$ ,  $df=24$

$p=0.0046$

Descriptive Statistics:

|         | Mean  | SEM   | N  |
|---------|-------|-------|----|
| mCherry | 9.142 | 2.491 | 15 |
| hM4Di   | 27.11 | 5.743 | 11 |

**Figure 2l: Number of mounts to LPS-female during COApm DREADD Inhibition:** Unpaired two-tailed t-test (95% confidence interval)

$t=3.105$ ,  $df=24$

$p=0.0048$

Descriptive Statistics:

|         | Mean  | SEM   | N  |
|---------|-------|-------|----|
| mCherry | 3.933 | 1.209 | 15 |
| hM4Di   | 11.45 | 2.310 | 11 |

**Figure 2m: Latency to mount to LPS-female during COApm DREADD Inhibition:** Unpaired two-tailed t-test (95% confidence interval)

$t=1.934$ ,  $df=24$

$p=0.0650$

Descriptive Statistics:

|         | Mean  | SEM   | N  |
|---------|-------|-------|----|
| mCherry | 420.9 | 45.44 | 15 |
| hM4Di   | 276.8 | 61.26 | 11 |

**Figure 3d: Max amplitude of bulk fluorescence signal in MEA *Vglut2(+)/Vgat(+)* neurons evoked by photoactivation of COApm with 400 pulses of light:** Unpaired two-tailed t-test (95% confidence interval)

$t=3.291$ ,  $df=6$

$p=0.0166$

Descriptive Statistics:

|                    | Mean    | SEM      | N |
|--------------------|---------|----------|---|
| <i>Vglut2</i> -Cre | 0.4981  | 0.1061   | 5 |
| <i>Vgat</i> -Cre   | 0.03228 | 0.004260 | 3 |

**Figure 3e: Number of light pulses for COApm photoactivation to elicit max bulk fluorescence signal in MEA *Vglut2(+)/Vgat(+)* neurons:** Unpaired two-tailed t-test (95% confidence interval)

$t=4.056$ ,  $df=6$

$p=0.0067$

Descriptive Statistics:

|  | Mean | SEM | N |
|--|------|-----|---|
|--|------|-----|---|

|                    |       |        |   |
|--------------------|-------|--------|---|
| <i>Vglut2</i> -Cre | 10.18 | 1.553  | 5 |
| <i>Vgat</i> -Cre   | 1.780 | 0.1060 | 3 |

**Figure 3f: Mounting time to healthy female during photoactivation of COApm-MEA projection:** Unpaired two-tailed t-test (95% confidence interval)

$t=5.533$ ,  $df=18$

$p<0.0001$

Descriptive Statistics:

|      | Mean  | SEM   | N  |
|------|-------|-------|----|
| EYFP | 41.74 | 5.358 | 10 |
| ChR2 | 5.824 | 3.663 | 10 |

**Figure 3g: Mounting time to healthy female during photoactivation of MEA-*Vglut2* neurons:** Unpaired two-tailed t-test (95% confidence interval)

$t=4.214$ ,  $df=13$

$p=0.0010$

Descriptive Statistics:

|      | Mean  | SEM   | N |
|------|-------|-------|---|
| EYFP | 60.86 | 12.54 | 7 |
| ChR2 | 7.420 | 4.635 | 8 |

**Figure 3h: Mounting time to LPS-female with DREADD inhibition of MEA-*Vglut2* neurons:** Unpaired two-tailed t-test (95% confidence interval)

$t=3.1952$ ,  $df=18$

$p=0.0050$

Descriptive Statistics:

|         | Mean  | SEM   | N  |
|---------|-------|-------|----|
| mCherry | 7.471 | 4.004 | 9  |
| hM4Di   | 32.31 | 6.200 | 11 |

**Figure 3i: Mounting time to healthy female during concurrent photoactivation of COApm-MEA projections and hM4Di-inhibition of MEA-*Vglut2* neurons:** Unpaired two-tailed t-test (95% confidence interval)

$t=3.205$ ,  $df=14$

$p=0.0064$

Descriptive Statistics:

|         | Mean  | SEM   | N |
|---------|-------|-------|---|
| mCherry | 10.86 | 3.968 | 8 |
| hM4Di   | 48.13 | 10.93 | 8 |



**Figure 4e: Percent male mounting to LPS-female during COApm hM4Di inhibition: Chi-Squared Test of Independence (95% confidence interval)**

$\chi^2=8.306$ ,  $df=1$

$p=0.0046$

Descriptive Statistics:

|      | Percent | N  |
|------|---------|----|
| EYFP | 100     | 13 |
| Chr2 | 50      | 10 |

**Figure 4f: Mounting time to healthy female during photoactivation COApm-TRH neurons: Two-way repeated measures ANOVA (95% confidence interval)**

| Source of variation   | F (DFn, DFd)    | P value |
|-----------------------|-----------------|---------|
| Group (EYFP vs. Chr2) | F(1,21) = 5.202 | 0.0331  |
| Light (On vs. Off)    | F(1,21) = 11.37 | 0.0029  |
| Interaction           | F(1,21) = 24.63 | <0.0001 |

Post-hoc (Bonferroni's):

| EYFP vs. Chr2 | P Value |
|---------------|---------|
| Light On      | 0.0004  |
| Light Off     | >0.9999 |

Descriptive Statistics:

|      | Light On |       |    | Light Off |       |    |
|------|----------|-------|----|-----------|-------|----|
|      | Mean     | SEM   | n  | Mean      | SEM   | n  |
| EYFP | 57.012   | 9.085 | 13 | 49.846    | 6.510 | 13 |
| Chr2 | 11.476   | 6.633 | 10 | 49.000    | 8.101 | 10 |

**Figure 4g: Number of mounts to healthy female during photoactivation of COApm-TRH neurons: Two-way repeated measures ANOVA (95% confidence interval)**

| Source of variation   | F (DFn, DFd)    | P value |
|-----------------------|-----------------|---------|
| Group (EYFP vs. Chr2) | F(1,21) =4.515  | 0.0456  |
| Light (On vs. Off)    | F(1,21) = 10.78 | 0.0035  |
| Interaction           | F(1,21) = 12.87 | 0.0017  |

Post-hoc (Bonferroni's):

| EYFP vs. Chr2 | P Value |
|---------------|---------|
|---------------|---------|

|           |        |
|-----------|--------|
| Light On  | 0.0042 |
| Light Off | 0.9886 |

Descriptive Statistics:

|      | Light On |       |    | Light Off |       |    |
|------|----------|-------|----|-----------|-------|----|
|      | Mean     | SEM   | n  | Mean      | SEM   | n  |
| EYFP | 15.308   | 2.863 | 13 | 14.923    | 2.605 | 13 |
| ChR2 | 3.800    | 1.837 | 10 | 12.500    | 1.797 | 10 |

**Figure 4h: Latency to mount to healthy female during photoactivation of COApm-TRH neurons:** Two-way repeated measures ANOVA (95% confidence interval)

| Source of variation   | F (DFn, DFd)    | P value |
|-----------------------|-----------------|---------|
| Group (EYFP vs. ChR2) | F(1,21) =4.633  | 0.0431  |
| Light (On vs. Off)    | F(1,21) = 15.32 | 0.0008  |
| Interaction           | F(1,21) = 24.90 | <0.0001 |

Post-hoc (Bonferroni's):

| EYFP vs. ChR2 | P Value |
|---------------|---------|
| Light On      | 0.0001  |
| Light Off     | 0.8440  |

Descriptive Statistics:

|      | Light On |        |    | Light Off |        |    |
|------|----------|--------|----|-----------|--------|----|
|      | Mean     | SEM    | n  | Mean      | SEM    | n  |
| EYFP | 181.071  | 19.675 | 13 | 213       | 33.939 | 13 |
| ChR2 | 431.896  | 66.741 | 10 | 167.448   | 34.661 | 10 |

**Figure 4j: Percent Co-expression of *Trhr* with *Vglut2/Vgat* in MEA:** Paired two-tailed t-test (95% confidence interval)

$t=7.663$ ,  $df=9$

$p<0.0001$

Descriptive Statistics:

|             | Mean  | SEM   | N  |
|-------------|-------|-------|----|
| Vglut2/Trhr | 58.58 | 3.614 | 10 |
| Vgat/Trhr   | 28.28 | 1.921 | 10 |

**Figure 4l: Percent male mounting to healthy female following microinjection of TRH analog taltirelin into MEA:** Chi-Squared Test of Independence (95% confidence interval)

$X^2=10.15$ ,  $df=1$

$p=0.0014$

Descriptive Statistics:

|            | Percent | N  |
|------------|---------|----|
| PBS        | 92.85   | 14 |
| Taltirelin | 40      | 15 |

**Figure 4m: Mounting time to healthy female following microinjection of TRH analog taltirelin into MEA:**

Unpaired two-tailed t-test (95% confidence interval)

$t=4.987$ ,  $df=27$

$p<0.0001$

Descriptive Statistics:

|            | Mean  | SEM    | N  |
|------------|-------|--------|----|
| PBS        | 24.75 | 4.574  | 14 |
| Taltirelin | 2.227 | 0.9290 | 15 |

**Figure 4n: Number of mounts to healthy female following microinjection of TRH analog taltirelin into MEA:**

Unpaired two-tailed t-test (95% confidence interval)

$t=3.900$ ,  $df=24$

$p=0.0006$

Descriptive Statistics:

|            | Mean  | SEM    | N  |
|------------|-------|--------|----|
| PBS        | 10.21 | 2.307  | 14 |
| Taltirelin | 1.200 | 0.6032 | 15 |

**Figure 4o: Latency to mount to healthy female following microinjection of TRH analog taltirelin into MEA:**

Unpaired two-tailed t-test (95% confidence interval)

$t=3.696$ ,  $df=27$

$p=0.0010$

Descriptive Statistics:

|            | Mean  | SEM   | N  |
|------------|-------|-------|----|
| PBS        | 284.5 | 39.55 | 14 |
| Taltirelin | 501.4 | 43.05 | 15 |

**Figure 4q: Percent male mounting in Trhr conditional KO mice:** Chi-Squared Test of Independence (95% confidence interval)

$X^2=10.06$ ,  $df=2$

$p=0.0065$

Descriptive Statistics:

|  | Percent | N |
|--|---------|---|
|--|---------|---|

|                            |      |    |
|----------------------------|------|----|
| WT:Cre                     | 27.3 | 11 |
| Trhr <sup>fl/fl</sup> :GFP | 50   | 8  |
| Trhr <sup>fl/fl</sup> :Cre | 91.7 | 12 |

**Figure 4r: Mounting time in Trhr conditional KO mice: One-way ANOVA (95% confidence interval)**

| Source of variation | F (DFn, DFd)     | P value |
|---------------------|------------------|---------|
| Group               | F (2,28) = 3.686 | 0.0379  |

Post-hoc (Bonferroni's):

| Comparison                                                | Significant |
|-----------------------------------------------------------|-------------|
| WT:Cre vs. Trhr <sup>fl/fl</sup> :GFP                     | No          |
| WT:Cre vs. Trhr <sup>fl/fl</sup> :Cre                     | P < 0.01    |
| Trhr <sup>fl/fl</sup> :GFP vs. Trhr <sup>fl/fl</sup> :Cre | P < 0.05    |

Descriptive Statistics:

|                            | Mean  | SEM   | N  |
|----------------------------|-------|-------|----|
| WT:Cre                     | 5.280 | 2.733 | 11 |
| Trhr <sup>fl/fl</sup> :GFP | 8.380 | 3.729 | 8  |
| Trhr <sup>fl/fl</sup> :Cre | 43.22 | 11.45 | 12 |

**Figure 4s: Number of mounts in Trhr conditional KO mice: One-way ANOVA (95% confidence interval)**

| Source of variation | F (DFn, DFd)      | P value |
|---------------------|-------------------|---------|
| Group               | F (2,28) = 0.9628 | 0.3941  |

Post-hoc (Bonferroni's):

| Comparison                                                | Significant |
|-----------------------------------------------------------|-------------|
| WT:Cre vs. Trhr <sup>fl/fl</sup> :GFP                     | No          |
| WT:Cre vs. Trhr <sup>fl/fl</sup> :Cre                     | P < 0.01    |
| Trhr <sup>fl/fl</sup> :GFP vs. Trhr <sup>fl/fl</sup> :Cre | P < 0.05    |

Descriptive Statistics:

|        | Mean | SEM   | N  |
|--------|------|-------|----|
| WT:Cre | 2    | 1.070 | 11 |

|                            |       |       |    |
|----------------------------|-------|-------|----|
| Trhr <sup>fl/fl</sup> :GFP | 2.750 | 1.373 | 8  |
| Trhr <sup>fl/fl</sup> :Cre | 8     | 1.409 | 12 |

**Figure 4t: Latency to mount in Trhr conditional KO mice: One-way ANOVA (95% confidence interval)**

| Source of variation | F (DFn, DFd)     | P value |
|---------------------|------------------|---------|
| Group               | F (2,28) = 1.320 | 0.2832  |

Post-hoc (Bonferroni's):

| Comparison                                                | Significant |
|-----------------------------------------------------------|-------------|
| WT:Cre vs. Trhr <sup>fl/fl</sup> :GFP                     | No          |
| WT:Cre vs. Trhr <sup>fl/fl</sup> :Cre                     | P < 0.001   |
| Trhr <sup>fl/fl</sup> :GFP vs. Trhr <sup>fl/fl</sup> :Cre | P < 0.05    |

Descriptive Statistics:

|                            | Mean  | SEM   | N  |
|----------------------------|-------|-------|----|
| WT:Cre                     | 531.0 | 37.33 | 11 |
| Trhr <sup>fl/fl</sup> :GFP | 447.9 | 62.38 | 8  |
| Trhr <sup>fl/fl</sup> :Cre | 267.6 | 41.36 | 12 |

**Extended Data Figure 1b: Mounting time to PBS/LPS female after presentation with PBS/LPS female pair:**

Paired two-tailed t-test (95% confidence interval)

t=11.58, df=8

p<0.0001

Descriptive Statistics:

|     | Mean  | SEM    | N |
|-----|-------|--------|---|
| PBS | 43.09 | 3.544  | 9 |
| LPS | 2.612 | 0.8804 | 9 |

**Extended Data Figure 1c: Mounting time to untreated healthy female: Paired two-tailed t-test (95% confidence interval)**

t=0.1176, df=7

p<0.9097

Descriptive Statistics:

|         | Mean  | SEM   | N |
|---------|-------|-------|---|
| Female1 | 22.95 | 3.058 | 8 |

|         |       |       |   |
|---------|-------|-------|---|
| Female2 | 22.56 | 2.341 | 8 |
|---------|-------|-------|---|

**Extended Data Figure 1d: Investigation time of PBS- and LPS-females in 3ch assay:** Paired two-tailed t-test (95% confidence interval)

$t=3.994$ ,  $df=10$

$p=0.0025$

Descriptive Statistics:

|      | Mean   | SEM    | N |
|------|--------|--------|---|
| Sham | 0.2000 | 0.2000 | 5 |
| VNOX | 13.45  | 2.760  | 7 |

**Extended Data Figure 1f: Duration of other typical male behaviors during direct interaction with a PBS- or LPS-female:** Two-way ANOVA (95% confidence interval)

| Source of variation                                                             | F (DFn, DFd)      | P value    |
|---------------------------------------------------------------------------------|-------------------|------------|
| Group (PBS or LPS)                                                              | F (1, 60) = 4.004 | P = 0.0499 |
| Male behavior (Facial investigation, Anogenital investigation, Social grooming) | F (2, 60) = 41.36 | P < 0.0001 |
| Interaction                                                                     | F (2, 60) = 11.86 | P < 0.0001 |

Post-hoc (Sidak's):

| PBS vs. LPS              | P Value    |
|--------------------------|------------|
| Facial investigation     | ns         |
| Anogenital investigation | P < 0.0001 |
| Social grooming          | ns         |

Descriptive Statistics:

|     | Facial investigation |       |    | Anogenital investigation |         |    | Social grooming |       |    |
|-----|----------------------|-------|----|--------------------------|---------|----|-----------------|-------|----|
|     | Mean                 | SEM   | n  | Mean                     | SEM     | n  | Mean            | SEM   | N  |
| PBS | 48.09                | 5.578 | 11 | 149.0                    | 22.6636 | 11 | 9.42            | 2.287 | 11 |
| LPS | 63.83                | 6.85  | 11 | 71.93                    | 7.9402  | 11 | 18.62           | 4.276 | 11 |

**Extended Data Figure 1g: Percentage of individual female behaviors during males' mounting attempts:** Two-way ANOVA (95% confidence interval)

| Source of variation | F (DFn, DFd) | P value |
|---------------------|--------------|---------|
|---------------------|--------------|---------|

|                                                   |                        |            |
|---------------------------------------------------|------------------------|------------|
| Group (PBS or LPS)                                | F (1, 52) = 1.099e-014 | P > 0.9999 |
| Female responses (Stand/lordosis, Run, Rear, Sit) | F (3, 52) = 5.844      | P =0.0016  |
| Interaction                                       | F (3, 52) = 6.461      | P =0.0008  |

Post-hoc (Sidak's):

| PBS vs. LPS    | P Value  |
|----------------|----------|
| Stand/Lordosis | Ns       |
| Run            | Ns       |
| Rear           | Ns       |
| Sit            | P < 0.01 |

Descriptive Statistics:

|     | Stan/Lordosis |        |    | Run   |        |    | Rear  |        |    | Sit   |         |    |
|-----|---------------|--------|----|-------|--------|----|-------|--------|----|-------|---------|----|
|     | Mean          | SEM    | n  | Mean  | SEM    | N  | Mean  | SEM    | N  | Mean  | SEM     | N  |
| PBS | 14.83         | 9.5407 | 11 | 56.78 | 9.6639 | 11 | 15.02 | 4.7006 | 11 | 13.38 | 5.4607  | 11 |
| LPS | 3.750         | 2.5282 | 11 | 24.25 | 8.1429 | 11 | 7.5   | 5.0564 | 11 | 64.50 | 12.3444 | 11 |

**Extended Data Figure 1h: Number of crossings** :Unpaired two-tailed t-test (95% confidence interval)

t=4.821, df=20

p=0.0001

Descriptive Statistics:

|     | Mean  | SEM   | N  |
|-----|-------|-------|----|
| PBS | 44.82 | 5.331 | 11 |
| LPS | 17.73 | 1.779 | 11 |

**Extended Data Figure 2a: Mounting time of VNO-removed or sham-surgery males to LPS-female:** Unpaired two-tailed t-test (95% confidence interval)

t=3.994, df=10

p=0.0025

Descriptive Statistics:

|  | Mean | SEM | N |
|--|------|-----|---|
|--|------|-----|---|

|      |        |        |   |
|------|--------|--------|---|
| Sham | 0.2000 | 0.2000 | 5 |
| VNOX | 13.45  | 2.760  | 7 |

**Extended Data Figure 2d: Number of tdTomato(+) neurons in BST, MEA, and COApm after Cre injection Ai14 reporter mice: One-way ANOVA (95% confidence interval)**

| Source of variation            | F (DFn, DFd)    | P value |
|--------------------------------|-----------------|---------|
| Brain Region (BST, MEA, COApm) | F (2,9) = 46.40 | 0.0001  |

Post-hoc (Bonferroni's):

| Comparison    | p Value |
|---------------|---------|
| BST vs. MEA   | 0.0031  |
| BST vs. COApm | <0.0001 |
| MEA vs. COApm | 0.0027  |

Descriptive Statistics:

|       | Mean  | SEM   | N |
|-------|-------|-------|---|
| BST   | 46.25 | 14.72 | 4 |
| MEA   | 540.3 | 52.75 | 4 |
| COApm | 1045  | 114.5 | 4 |

**Extended Data Figure 2h: Number of FOS (+) cells in AOBmi, AOBgr, BST, MEApd, MEApv, and COApm after exposure to PBS or LPS-female: Two-way ANOVA (95% confidence interval)**

| Source of variation                                   | F (DFn, DFd)      | P value    |
|-------------------------------------------------------|-------------------|------------|
| Treatment (PBS or LPS)                                | F (1, 84) = 3.599 | P < 0.0001 |
| Brain Region (AOBmi, AOBgr, BST, MEApd, MEApv, COApm) | F (5, 84) = 51.44 | P < 0.0054 |
| Interaction                                           | F (5, 84) = 6.670 | P < 0.0001 |

Post-hoc (Sidak's):

| PBS vs. LPS | P Value |
|-------------|---------|
| AOBmi       | 0.9992  |
| AOBgr       | 0.0008  |
| BST         | 0.5652  |
| MEApd       | 0.9900  |
| MEApv       | 0.0014  |



|       |         |
|-------|---------|
| COApm | <0.0001 |
|-------|---------|

Descriptive Statistics:

|     | AOBmi   |        |        | AOBgr   |        |   | BST     |        |   |
|-----|---------|--------|--------|---------|--------|---|---------|--------|---|
|     | Mean    | SEM    | n      | Mean    | SEM    | n | Mean    | SEM    | n |
| PBS | 32.8229 | 5.5653 | 8      | 24.3021 | 3.9374 | 8 | 36.0938 | 3.8553 | 8 |
| LPS | 35.75   | 6.0112 | 8      | 54.2188 | 4.03   | 8 | 47.53   | 3.93   | 8 |
|     | MEApd   |        |        | MEApv   |        |   | COApm   |        |   |
|     | Mean    | SEM    | n      | Mean    | SEM    | n | Mean    | SEM    | n |
| PBS | 19.4    | 3.76   | 8      | 19.927  | 3.284  | 8 | 11.406  | 2.204  | 8 |
| LPS | 24.093  | 4.029  | 48.593 | 48.594  | 3.53   | 8 | 65.08   | 1.2    | 8 |

**Extended Data Figure 3e: Mean z-score of the fluorescence during direct investigation of the estrus or diestrus female: Paired two-tailed t-test (95% confidence interval)**

$t=1.197$ ,  $df=4$

$p=0.2975$

Descriptive Statistics:

|          | Mean  | SEM    | N |
|----------|-------|--------|---|
| Estrus   | 3.307 | 0.2163 | 5 |
| Diestrus | 2.965 | 0.4058 | 5 |

**Extended Data Figure 3f: Percent mice mounting to Estrus or Diestrus female: Chi-Squared Test of Independence (95% confidence interval)**

$X^2=1.091$ ,  $df=1$

$p=0.2963$

Descriptive Statistics:

|          | Percent | N |
|----------|---------|---|
| Estrus   | 100     | 6 |
| Diestrus | 83.3    | 6 |

**Extended Data Figure 3g: Mounting time to Estrus or Diestrus female: Unpaired two-tailed t-test (95% confidence interval)**

$t=0.6582$ ,  $df=10$

$p=0.5252$

Descriptive Statistics:

|          | Mean  | SEM   | N |
|----------|-------|-------|---|
| Estrus   | 43.02 | 11.22 | 6 |
| Diestrus | 33.98 | 7.913 | 6 |

**Extended Data Figure 3h: Number of mounts to Estrus or Diestrus female:** Unpaired two-tailed t-test (95% confidence interval)

$t=0.5392$ ,  $df=10$

$p<0.6016$

Descriptive Statistics:

|          | Mean  | SEM   | N |
|----------|-------|-------|---|
| Estrus   | 9.667 | 1.926 | 6 |
| Diestrus | 11.50 | 2.802 | 6 |

**Extended Data Figure 3i: Latency to mount to Estrus or Diestrus female:** Unpaired two-tailed t-test (95% confidence interval)

$t=0.2871$ ,  $df=10$

$p=0.7799$

Descriptive Statistics:

|          | Mean  | SEM   | N |
|----------|-------|-------|---|
| Estrus   | 226.7 | 32.72 | 6 |
| Diestrus | 249.8 | 73.44 | 6 |

**Extended Data Figure 3j: Percent mating plug at 24h of Estrus or Diestrus females:** Chi-Squared Test of Independence (95% confidence interval)

$X^2=5.333$ ,  $df=1$

$p=0.0209$

Descriptive Statistics:

|          | Percent | N |
|----------|---------|---|
| Estrus   | 83.3    | 6 |
| Diestrus | 16.7    | 6 |

**Extended Data Figure 4c: Number of FOS (+) cells in COApm of males after exposure to PBS- or LPS-odor:** Unpaired two-tailed t-test (95% confidence interval)

$t=5.979$ ,  $df=12$

$p<0.0001$

Descriptive Statistics:

|          | Mean  | SEM   | N |
|----------|-------|-------|---|
| PBS-odor | 22.38 | 2.426 | 6 |
| LPS-odor | 43.61 | 2.473 | 8 |

**Extended Data Figure 4c: Mean z-score of the fluorescence in COApm evoked by the PBS- or LPS-odor investigation:** Paired two-tailed t-test (95% confidence interval)

$t=4.424$ ,  $df=5$

$p=0.0069$

Descriptive Statistics:

|          | Mean  | SEM    | N |
|----------|-------|--------|---|
| PBS-odor | 4.295 | 0.8788 | 6 |
| LPS-odor | 7.498 | 1.161  | 6 |

**Extend Data Figure 4g: Percent mice mounting to PBS- or LPS-odor applied female:** Chi-Squared Test of Independence (95% confidence interval)

$$X^2=5.838, df=1$$

$$p=0.0157$$

Descriptive Statistics:

|          | Percent | N  |
|----------|---------|----|
| PBS-odor | 80      | 10 |
| LPS-odor | 27.27   | 11 |

**Extend Data Figure 4h: Mounting time to PBS- or LPS-odor applied female:** Unpaired two-tailed t-test (95% confidence interval)

$$t=2.371, df=19$$

$$p=0.0285$$

Descriptive Statistics:

|          | Mean  | SEM   | N  |
|----------|-------|-------|----|
| PBS-odor | 29.18 | 10.89 | 10 |
| LPS-odor | 3.949 | 2.323 | 11 |

**Extend Data Figure 4i: Number of mounts to PBS- or LPS-odor applied female:** Unpaired two-tailed t-test (95% confidence interval)

$$t=2.828, df=19$$

$$p<0.0108$$

Descriptive Statistics:

|          | Mean  | SEM    | N  |
|----------|-------|--------|----|
| PBS-odor | 8.1   | 2.297  | 10 |
| LPS-odor | 1.455 | 0.8242 | 11 |

**Extend Data Figure 4j: Latency to mount to PBS- or LPS-odor applied female:** Unpaired two-tailed t-test (95% confidence interval)

$$t=3.222, df=19$$

$$p=0.0045$$

Descriptive Statistics:

|          | Mean  | SEM   | N  |
|----------|-------|-------|----|
| PBS-odor | 298.8 | 63.83 | 10 |
| LPS-odor | 531.6 | 37.31 | 11 |

**Extended Data Figure 4k: Duration of other typical male behaviors during direct interaction with a PBS- or LPS-odor applied female: Two-way ANOVA (95% confidence interval)**

| Source of variation                                                             | F (DFn, DFd)      | P value    |
|---------------------------------------------------------------------------------|-------------------|------------|
| Group (PBS or LPS)                                                              | F (1, 57) = 4.172 | P = 0.0457 |
| Male behavior (Facial investigation, Anogenital investigation, Social grooming) | F (2, 57) = 94.47 | P < 0.0001 |
| Interaction                                                                     | F (2, 57) = 3.909 | P = 0.0256 |

Post-hoc (Sidak's):

| PBS vs. LPS              | P Value    |
|--------------------------|------------|
| Facial investigation     | P = 0.9661 |
| Anogenital investigation | P = 0.0038 |
| Social grooming          | P = 0.9219 |

Descriptive Statistics:

|     | Facial investigation |       |    | Anogenital investigation |        |    | Social grooming |       |    |
|-----|----------------------|-------|----|--------------------------|--------|----|-----------------|-------|----|
|     | Mean                 | SEM   | n  | Mean                     | SEM    | n  | Mean            | SEM   | N  |
| PBS | 46.5                 | 7.935 | 10 | 131.0                    | 8.825  | 10 | 7.108           | 3.755 | 10 |
| LPS | 51.19                | 6.066 | 11 | 93.09                    | 13.232 | 11 | 0.7673          | 0.444 | 11 |

**Extended Data Figure 4l: Percentage of individual female behaviors during males' mounting attempts: Two-way ANOVA (95% confidence interval)**

| Source of variation                               | F (DFn, DFd)           | P value    |
|---------------------------------------------------|------------------------|------------|
| Group (PBS or LPS)                                | F (1, 36) = 1.137e-014 | P > 0.9999 |
| Female responses (Stand/lordosis, Run, Rear, Sit) | F (3, 36) = 10.12      | P < 0.0001 |
| Interaction                                       | F (3, 36) = 0.2828     | P = 0.8374 |

Post-hoc (Sidak's):

| PBS vs. LPS    | P Value |
|----------------|---------|
| Stand/Lordosis | 0.9751  |

|      |         |
|------|---------|
| Run  | 0.9271  |
| Rear | >0.9999 |
| Sit  | 0.9986  |

Descriptive Statistics:

|     | Stan/Lordosis |       |   | Run    |        |   | Rear   |       |   | Sit  |      |   |
|-----|---------------|-------|---|--------|--------|---|--------|-------|---|------|------|---|
|     | Mean          | SEM   | n | Mean   | SEM    | N | Mean   | SEM   | N | Mean | SEM  | N |
| PBS | 16.241        | 10.64 | 8 | 59.745 | 13.792 | 8 | 10.01  | 6.03  | 8 | 14.0 | 7.22 | 8 |
| LPS | 7.246         | 7.246 | 3 | 71.956 | 5.728  | 3 | 11.014 | 5.862 | 3 | 9.78 | 7.71 | 3 |

**Extended Data Figure 4m: Number of cage crossings:** Unpaired two-tailed t-test (95% confidence interval)

$t=0.01627$ ,  $df=19$

$p=0.9872$

Descriptive Statistics:

|     | Mean  | SEM   | N  |
|-----|-------|-------|----|
| PBS | 46    | 4.650 | 10 |
| LPS | 45.91 | 3.251 | 11 |

**Extended Data Figure 5b: Investigation time to healthy female during COApm photoactivation:** Two-way repeated measures ANOVA (95% confidence interval)

| Source of variation   | F (DFn, DFd)   | P value |
|-----------------------|----------------|---------|
| Group (EYFP vs. Chr2) | F(1,14)=0.6806 | 0.4232  |
| Light (On vs. Off)    | F(1,14)=0.5351 | 0.4766  |
| Interaction           | F(1,14)=0.3492 | 0.5640  |

Post-hoc (Bonferroni's):

| EYFP vs. Chr2 | P Value |
|---------------|---------|
| ON            | 0.9988  |
| OFF           | 0.5807  |

Descriptive Statistics:

|  | Light On |     |   | Light Off |     |   |
|--|----------|-----|---|-----------|-----|---|
|  | Mean     | SEM | n | Mean      | SEM | n |
|  |          |     |   |           |     |   |

|      |         |        |   |         |        |   |
|------|---------|--------|---|---------|--------|---|
| EYFP | 223.942 | 18.561 | 9 | 194.796 | 14.653 | 9 |
| ChR2 | 222.771 | 24.212 | 7 | 219.674 | 16.500 | 7 |

**Extended Data Figure 5c: Grooming time during COApm photoactivation:** Unpaired two-tailed t-test (95% confidence interval)

$t=2.175$ ,  $df=14$

$p=0.0473$

Descriptive Statistics:

|      | Mean  | SEM   | N |
|------|-------|-------|---|
| EYFP | 8.543 | 1.910 | 9 |
| ChR2 | 16.68 | 3.48  | 7 |

**Extended Data Figure 5d: Percentage of photoactivation trials with self-grooming:** Unpaired two-tailed t-test (95% confidence interval)

$t=1.219$ ,  $df=14$

$p=0.2429$

Descriptive Statistics:

|      | Mean  | SEM   | N |
|------|-------|-------|---|
| EYFP | 16.91 | 3.330 | 9 |
| ChR2 | 22.41 | 2.773 | 7 |

**Extended Data Figure 5f: Investigation time to LPS-female during COApm DREADD Inhibition:** Unpaired two-tailed t-test (95% confidence interval)

$t=0.8427$ ,  $df=24$

$p=0.4077$

Descriptive Statistics:

|         | Mean  | SEM   | N  |
|---------|-------|-------|----|
| mCherry | 203.6 | 15.28 | 15 |
| hM4Di   | 226.8 | 24.48 | 11 |

**Extended Data Figure 5h: Percent male mounting to LPS-female during COApm hM4Di inhibition:** Chi-Squared Test of Independence (95% confidence interval)

$X^2=3.616$ ,  $df=1$

$p=0.0572$

Descriptive Statistics:

|        | Percent | N |
|--------|---------|---|
| Saline | 44.4    | 8 |
| CNO    | 85.7    | 7 |

**Extended Data Figure 5i: Mounting time to LPS female during COApm hM4Di Inhibition:** Unpaired two-tailed t-test (95% confidence interval)

t=3.044, df=13

p=0.0094

Descriptive Statistics:

|        | Mean  | SEM    | N |
|--------|-------|--------|---|
| Saline | 1.010 | 0.5569 | 8 |
| CNO    | 20.19 | 6.745  | 7 |

**Extended Data Figure 5j: Number of mounts to LPS female during COApm hM4Di Inhibition:** Unpaired two-tailed t-test (95% confidence interval)

t=2.723, df=13

p=0.0174

Descriptive Statistics:

|        | Mean   | SEM    | N |
|--------|--------|--------|---|
| Saline | 0.7500 | 0.4119 | 8 |
| CNO    | 6.143  | 2.075  | 7 |

**Extended Data Figure 5k: Latency to mount to LPS female during COApm hM4Di Inhibition:** Unpaired two-tailed t-test (95% confidence interval)

t=1.821, df=13

p=0.0917

Descriptive Statistics:

|        | Mean  | SEM   | N |
|--------|-------|-------|---|
| Saline | 511.4 | 45.45 | 8 |
| CNO    | 361.5 | 71.24 | 7 |

**Extended Data Figure 5m: Percent male mounting to LPS-female during COApm hM4Di inhibition:** Chi-Squared Test of Independence (95% confidence interval)

$X^2=N/A$ , df=NA

p=NA

Descriptive Statistics:

|         | Percent | N |
|---------|---------|---|
| mCherry | 100     | 8 |
| hM4Di   | 100     | 8 |

**Extended Data Figure 5n: Mounting time to healthy female during COApm hM4Di Inhibition:** Unpaired two-tailed t-test (95% confidence interval)

t=0.7289, df=14

p=0.4781

Descriptive Statistics:

|  | Mean | SEM | N |
|--|------|-----|---|
|--|------|-----|---|

|         |       |       |   |
|---------|-------|-------|---|
| mCherry | 41.66 | 8.492 | 8 |
| hM4Di   | 50.96 | 9.523 | 8 |

**Extended Data Figure 5o: Number of mounts to healthy female during COApm DREADD Inhibition:**

Unpaired two-tailed t-test (95% confidence interval)

$t=0.08068$ ,  $df=14$

$p=0.9368$

Descriptive Statistics:

|         | Mean  | SEM   | N |
|---------|-------|-------|---|
| mCherry | 12.38 | 2.375 | 8 |
| hM4Di   | 12.63 | 1.990 | 8 |

**Extended Data Figure 5p: Latency to mount to healthy female during COApm DREADD Inhibition:** Unpaired two-tailed t-test (95% confidence interval)

$t=0.9176$ ,  $df=14$

$p=0.3743$

Descriptive Statistics:

|         | Mean  | SEM   | N |
|---------|-------|-------|---|
| mCherry | 166.6 | 26.84 | 8 |
| hM4Di   | 201.3 | 26.65 | 8 |

**Extended Data Figure 5r: Percent male mounting to diestrus female during COApm hM4Di inhibition:** Chi-Squared Test of Independence (95% confidence interval)

$\chi^2=NA$ ,  $df=NA$

$p=NA$

Descriptive Statistics:

|        | Percent | N |
|--------|---------|---|
| Saline | 100     | 6 |
| CNO    | 100     | 6 |

**Extended Data Figure 5s: Mounting time to diestrus female during COApm hM4Di Inhibition:** Unpaired two-tailed t-test (95% confidence interval)

$t=0.1304$ ,  $df=10$

$p=0.8988$

Descriptive Statistics:

|        | Mean  | SEM   | N |
|--------|-------|-------|---|
| Saline | 32.88 | 5.485 | 6 |
| CNO    | 33.91 | 5.719 | 6 |

**Extended Data Figure 5t: Number of mounts to diestrus female during COApm hM4Di Inhibition:** Unpaired two-tailed t-test (95% confidence interval)

$t=0.7984$ ,  $df=10$



p=0.4432

Descriptive Statistics:

|        | Mean  | SEM    | N |
|--------|-------|--------|---|
| Saline | 10.17 | 1.990  | 6 |
| CNO    | 8.333 | 1.1145 | 6 |

**Extended Data Figure 5u: Latency to mount to diestrus female during COApm hM4Di Inhibition:** Unpaired two-tailed t-test (95% confidence interval)

t=0.3211, df=10

p=0.7548

Descriptive Statistics:

|        | Mean  | SEM   | N |
|--------|-------|-------|---|
| Saline | 248.8 | 27.02 | 6 |
| CNO    | 263.9 | 38.62 | 6 |

**Extended Data Figure 6i: Mean z-score of the MEA fluorescence during direct investigation of the PBS- or LPS-female:** Paired two-tailed t-test (95% confidence interval)

t=4.512, df=2

p=0.0458

Descriptive Statistics:

|     | Mean  | SEM    | N |
|-----|-------|--------|---|
| PBS | 2.044 | 0.9928 | 3 |
| LPS | 6.247 | 1.321  | 3 |

**Extended Data Figure 7a: Percent male mounting to healthy female during photoactivation of COApm-MEA projection:** Chi-Squared Test of Independence (95% confidence interval)

$X^2=8.571$ , df=1

p=0.0034

Descriptive Statistics:

|      | Percent | N  |
|------|---------|----|
| EYFP | 100     | 10 |
| ChR2 | 40      | 10 |

**Extended Data Figure 7b: Percent male mounting to healthy female during photoactivation of MEA-Vglut2 neurons:** Chi-Squared Test of Independence (95% confidence interval)

$X^2=4.773$ , df=1

p=0.0289

Descriptive Statistics:

|      | Percent | N |
|------|---------|---|
| EYFP | 100     | 7 |
| ChR2 | 50      | 8 |

**Extended Data Figure 7c: Percent male mounting to LPS-female with DREADD inhibition of MEA-*Vglut2* neurons:** Chi-Squared Test of Independence (95% confidence interval)

$X^2=12.18$ ,  $df=1$

$p=0.0005$

Descriptive Statistics:

|         | Percent | N  |
|---------|---------|----|
| mCherry | 44.4    | 9  |
| hM4Di   | 100     | 11 |

**Extended Data Figure 7d: Percent male mounting to healthy female during concurrent photoactivation of COApm-MEA projections and hM4Di-inhibition of MEA-*Vglut2* neurons:** Chi-Squared Test of Independence (95% confidence interval)

$X^2=2.286$ ,  $df=1$

$p=0.1306$

Descriptive Statistics:

|         | Percent | N |
|---------|---------|---|
| mCherry | 75      | 8 |
| hM4Di   | 100     | 8 |

**Extended Data Figure 7e: Number of mounts to healthy female during photoactivation of COApm-MEA projection:** Unpaired two-tailed t-test (95% confidence interval)

$t=5.686$ ,  $df=18$

$p<0.0001$

Descriptive Statistics:

|      | Mean  | SEM   | N  |
|------|-------|-------|----|
| EYFP | 14.60 | 1.408 | 10 |
| ChR2 | 2.600 | 1.572 | 10 |

**Extended Data Figure 7f: Number of mounts to healthy female during photoactivation of MEA-*Vglut2* neurons:** Unpaired two-tailed t-test (95% confidence interval)

$t=3.427$ ,  $df=13$

$p=0.0045$

Descriptive Statistics:

|      | Mean | SEM   | N |
|------|------|-------|---|
| EYFP | 14   | 2.862 | 7 |

|      |   |       |   |
|------|---|-------|---|
| ChR2 | 3 | 1.669 | 8 |
|------|---|-------|---|

**Extended Data Figure 7g: Number of mounts to LPS-female with DREADD inhibition of MEA-*Vglut2* neurons:** Unpaired two-tailed t-test (95% confidence interval)

$t=2.250$ ,  $df=18$

$p=0.0372$

Descriptive Statistics:

|         | Mean  | SEM   | N  |
|---------|-------|-------|----|
| mCherry | 3.333 | 1.818 | 9  |
| hM4Di   | 8.818 | 1.628 | 11 |

**Extended Data Figure 7h: Number of mounts to healthy female during concurrent photoactivation of COApm-MEA projections and hM4Di-inhibition of MEA-*Vglut2* neurons:** Unpaired two-tailed t-test (95% confidence interval)

$t=2.167$ ,  $df=14$

$p=0.0479$

Descriptive Statistics:

|         | Mean  | SEM   | N |
|---------|-------|-------|---|
| mCherry | 5.750 | 1.906 | 8 |
| hM4Di   | 13.75 | 3.161 | 8 |

**Extended Data Figure 7i: Latency to mounts to healthy female during photoactivation of COApm-MEA projection:** Unpaired two-tailed t-test (95% confidence interval)

$t=4.596$ ,  $df=18$

$p=0.0002$

Descriptive Statistics:

|      | Mean  | SEM   | N  |
|------|-------|-------|----|
| EYFP | 201.7 | 38.34 | 10 |
| ChR2 | 507.6 | 53.68 | 10 |

**Extended Data Figure 7j: Latency to mounts to healthy female during photoactivation of MEA-*Vglut2* neurons:** Unpaired two-tailed t-test (95% confidence interval)

$t=3.669$ ,  $df=13$

$p=0.0028$

Descriptive Statistics:

|      | Mean  | SEM   | N |
|------|-------|-------|---|
| EYFP | 167.3 | 32.08 | 7 |
| ChR2 | 454.4 | 67.35 | 8 |

**Extended Data Figure 7k: Latency to mounts to LPS-female with DREADD inhibition of MEA-*Vglut2* neurons:** Unpaired two-tailed t-test (95% confidence interval)

$t=3.692$ ,  $df=18$

p=0.0017

Descriptive Statistics:

|         | Mean  | SEM   | N  |
|---------|-------|-------|----|
| mCherry | 446.2 | 68.71 | 9  |
| hM4Di   | 155.8 | 43.85 | 11 |

**Extended Data Figure 7l: Latency to mounts to healthy female during concurrent photoactivation of COApm-MEA projections and hM4Di-inhibition of MEA-*Vglut2* neurons:** Unpaired two-tailed t-test (95% confidence interval)

t=1.854, df=14

p=0.0849

Descriptive Statistics:

|         | Mean  | SEM   | N |
|---------|-------|-------|---|
| mCherry | 370.3 | 73.61 | 8 |
| hM4Di   | 204.4 | 50.89 | 8 |

**Extended Data Figure 9c: Number of FOS(+) cells in COApm-TRH (-) cells photoactivation:** Unpaired two-tailed t-test (95% confidence interval)

t=5.533, df=4

p=0.0052

Descriptive Statistics:

|         | Mean  | SEM   | N |
|---------|-------|-------|---|
| Control | 10.67 | 1.764 | 3 |
| ChR2    | 67.33 | 10.09 | 3 |

**Extended Data Figure 9d: Percent male mounting to healthy female with photoactivation of COApm-TRH (-) cells:** Chi-Squared Test of Independence (95% confidence interval)

$X^2=NA$ , df=NA

p=NA

Descriptive Statistics:

|         | Mean | N |
|---------|------|---|
| Control | 100  | 5 |
| ChR2    | 100  | 5 |

**Extended Data Figure 9e: Mounting time to healthy female with photoactivation of COApm-TRH(-) cells:** Unpaired two-tailed t-test (95% confidence interval)

t=1.329, df=8

p=0.2204

Descriptive Statistics:

|  | Mean | SEM | N |
|--|------|-----|---|
|--|------|-----|---|

|         |       |       |   |
|---------|-------|-------|---|
| Control | 35.58 | 5.929 | 5 |
| ChR2    | 61.72 | 17.96 | 5 |

**Extended Data Figure 9f: Number of mounts to healthy female with photoactivation of COApm-TRH(-) cells:**

Unpaired two-tailed t-test (95% confidence interval)

$t=0.08528$ ,  $df=8$

$p=0.9341$

Descriptive Statistics:

|         | Mean  | SEM   | N |
|---------|-------|-------|---|
| Control | 10.60 | 1.288 | 5 |
| ChR2    | 10.80 | 1.960 | 5 |

**Extended Data Figure 9g: Latency to mount to healthy female with photoactivation of COApm-TRH(-) cells:**

Unpaired two-tailed t-test (95% confidence interval)

$t=0.9694$ ,  $df=8$

$p=0.3608$

Descriptive Statistics:

|         | Mean  | SEM   | N |
|---------|-------|-------|---|
| Control | 174.1 | 44.41 | 5 |
| ChR2    | 241   | 52.82 | 5 |

**Extended Data Figure 9l: ACU of the average fluorescence signal in MEA-Vglut2 neurons calcium imaging:**

Friedman test (95% confidence interval)

| Source of variation | Friedman statistic | P value |
|---------------------|--------------------|---------|
| Time                | 23.24              | 0.0003  |

Post-hoc (Bonferroni's):

| Comparison          | Significant  |
|---------------------|--------------|
| Baseline vs. 0-30s  | $P > 0.9999$ |
| Baseline vs. 0-60s  | $P = 0.2243$ |
| Baseline vs. 0-90s  | $P = 0.0101$ |
| Baseline vs. 0-120s | $P = 0.0019$ |
| Baseline vs. 0-150s | $P = 0.0101$ |

**Extended Data Figure 9m: Investigation time following microinjection of taltirelin into MEA: Unpaired two-**

tailed t-test (95% confidence interval)

$t=4.171$ ,  $df=27$

p=0.0003

Descriptive Statistics:

|            | Mean  | SEM   | N  |
|------------|-------|-------|----|
| PBS        | 262.8 | 17.13 | 14 |
| Taltirelin | 150.8 | 20.43 | 15 |

**Extended Data Figure 10c: Percent of Trhr (+) cells following Cre expression in MEA:** Unpaired two-tailed t-test (95% confidence interval)

t=18.59, df=4

p<0.0001

Descriptive Statistics:

|                                | Mean  | SEM   | N |
|--------------------------------|-------|-------|---|
| Trhr <sup>fl/fl</sup>          | 84.07 | 3.225 | 3 |
| Trhr <sup>fl/fl</sup> with Cre | 14.76 | 1.873 | 3 |

**Extended Data Figure 10g: Amplitudes of MEApv responses evoked by photoactivation of COApm inputs:**

Unpaired two-tailed t-test (95% confidence interval)

t=4.663, df=10

p=0.0009

Descriptive Statistics:

|     | Mean  | SEM    | N |
|-----|-------|--------|---|
| GFP | 3.535 | 0.3301 | 6 |
| Cre | 1.570 | 0.2619 | 6 |
